1 **Title:** Efficacy of Transposition of Plicated Medial Rectus Muscles in the Treatment of A- or  
2 V- Pattern Exotropia (An Egyptian Comparative Study).

3 **Full names of all authors:**

4 Lamiaa A. El-aidy: Masters degree in Ophthalmology, Zagazig University

5 Yasser M. Ibrahim: Doctorate degree (MD) in Ophthalmology, Zagazig University

6 Mohamed A. Elmarakby: Doctorate degree (MD) in Ophthalmology, Zagazig University

7 Manar A. Ghali: Doctorate degree (MD) in Ophthalmology, Zagazig University

8 **Institutional affiliations of all authors:**

9 Zagazig University, Ophthalmology Department, Zagazig, Egypt.

10 **Corresponding author:**

11 Lamiaa A. El-aidy

12 Zagazig University, Ophthalmology Department, Zagazig, Egypt

13 Postal address: 44519

14 [lelaidy@outlook.com](mailto:lelaidy@outlook.com)

15 ORCID 0009-0005-8972-1588

16

17

18

19 **Keywords:** pattern exotropia; medial rectus; plication; transposition

20 **Abstract**

21 **Objective**

22 To report effectiveness of bimedial plication and vertical transposition for correction of exotropia  
23 associated with A- or V-pattern and compare it with bimedial resection and vertical transposition.

24 **Methods and analysis**

25 We retrospectively reviewed the results of surgery of patients who underwent bimedial plication  
26 (group I) versus bimedial resection (group II) with vertical offset to correct both exotropia and  
27 pattern deviation not secondary to oblique overaction in the period between January 2021 and  
28 January 2023. Results of both groups were compared. Success was considered when pattern  
29 deviation was  $\leq 8$  prism diopters PD and horizontal deviation was within 10 PD of orthophoria at 6  
30 months postoperatively.

31 **Results**

32 The mean preoperative angle of exotropia in PD was  $40.6 \pm 7.2$  in group I and  $41.1 \pm 7.5$  in group  
33 II ( $p=.8$ ). At 6 months postoperatively, they achieved angle of  $4.6 \pm 4.1$  and  $2.5 \pm 4.5$  PD  
34 respectively (no significant difference between both groups;  $p=.19$ ). The mean preoperative pattern  
35 deviation was  $21.3 \pm 3.7$  PD in group I and  $21.6 \pm 4.4$  in group II. Postoperative pattern collapse  
36 was  $16.7 \pm 5.6$  and  $16.6 \pm 4.1$  respectively. The percentage of success in pattern collapse was  
37 90.6% in group I and 84.4% in group II (no significant difference between both groups;  $p=.71$ ).

38 **Conclusion**

39 Vertical transposition with plication of medial recti is a safe, effective, and rapid technique for  
40 correction of cases of A- or V- pattern exotropia not associated with oblique overaction. Results  
41 were not significantly different from resection/vertical transposition.

42 **What is already known in this topic?**

- 43 • A- or V-pattern exotropia without significant inferior oblique overaction can be treated by vertical  
44 transposition of the horizontal recti after ordinary recession or resection.
- 45 • Some studies reported muscle plication and transposition as an alternative technique to resection  
46 and transposition. Plication allow preservation of ciliary circulation and lowering the incidence of  
47 muscle loss.

48 **What this study adds?**

- 49 • In this retrospective study, we concluded that medial rectus plication and transposition is an  
50 effective alternative technique to medial rectus resection and transposition in treatment of A- or V-  
51 pattern exotropia without significant inferior oblique overaction (No significant difference between  
52 both techniques).

53 **What this study might affect research, practice or policy?**

- 54 • Vertical Transposition of plicated medial recti is a new promising technique which should be  
55 considered in managing cases of A- or V-pattern exotropia without significant inferior oblique  
56 overaction.

57

58

59

## 60 **Introduction**

61 The amount of horizontal deviation in strabismic patients may differ in upgaze and downgaze apart  
62 from the primary position. This difference is called A- and V-patterns or alphabetical patterns [1].

63 A-pattern is described when the difference in horizontal deviation between upgaze and downgaze  
64 is more than 10 PD, with more divergence in downgaze, while V-pattern is described when this  
65 difference is more than 15 PD, with more divergence in upgaze [2].

66 The reported prevalence of A- or V-patterns in patients with horizontal deviation ranges between  
67 20% and 50% in different studies [3].

68 Many theories were proposed to clarify the etiology of alphabetical patterns, like: oblique muscle  
69 overaction or palsy, nerve misdirection such as Duane syndrome, orbital factors as craniofacial  
70 abnormalities, heterotopia of muscle pulleys, extraocular muscles' anomalies, and disruption of  
71 fusion [4,5].

72 Intermittent exotropia is the most common type of exodeviation. It is a large phoria that can be  
73 controlled intermittently by fusional mechanisms and may later progress spontaneously into  
74 constant exotropia with loss of control. A- and V-patterns are seen in a large number of patients  
75 with typical intermittent exotropia [1,7].

76 Detection of pattern deviation in cases of exotropia or horizontal deviation — in general — is very  
77 important before determining surgical intervention. Unrecognized patterns may lead to either  
78 postoperative over or undercorrection or may raise the need for more surgeries to improve the  
79 undesirable surgical outcomes [2].

80 The generally-accepted surgical corrections of pattern strabismus include oblique muscle  
81 weakening when there is obvious oblique muscle overaction [9,10], and horizontal muscle  
82 transposition when there is not [11–13].

83 However, both procedures can be done together in large patterns [2].

84 Other approaches include surgery on vertical recti (nasal or temporal horizontal displacement of  
85 insertions) and slanting of horizontal recti insertions [12].

86 Many options are advocated for the correction of exotropia: unilateral recession resection, bilateral  
87 lateral rectus recession or bimedial resection. A three or four-muscle surgery may be done in large  
88 angle exotropia [13].

89 Muscle plication is an alternative surgical procedure to muscle resection, used to strengthen the  
90 muscle. It has the benefit of being potentially reversible as well as being better in preserving the  
91 anterior ciliary circulation; thus lowering the risk of anterior segment ischemia [16,17].

92 Plication also reduces the risk of a lost muscle, and it can be performed using adjustable-suture  
93 techniques [16].

94 The combination of both vertical transposition and plication of the horizontal recti is one of the  
95 newer techniques used for the correction of cases with both vertical and horizontal strabismus (as  
96 elaborated in the discussion) [14,16].

97 In this retrospective cohort study, we chose cases with primary exotropia — either constant or  
98 intermittent — associated with pattern deviation who underwent either medial rectus muscle  
99 plication and transposition or the standard technique in which resection is done instead of plication

100 with either superior or inferior transposition according to type of pattern (A or V). We  
101 hypothesized that this technique is as effective as bimedial resection and transposition. However,  
102 bimedial plication and transposition will offer advantages regarding safety, short operation time as  
103 well as decreasing incidence of postoperative anterior segment ischemia.

#### 104 **Subjects and methods**

105 The study was approved by the Zagazig University Institutional Review Board (IRB). Informed  
106 consent was taken from patients or the parents (for children less than 16 years old). All surgeries  
107 were performed at Ophthalmology department of Zagazig University Hospitals.

108 The medical records of patients diagnosed with A- or V- pattern exotropia with no or minimal  
109 oblique overaction, who underwent strabismus surgery between January 2021 and January 2023;  
110 were retrospectively reviewed. Only patients with primary exotropia (either constant or  
111 intermittent) with angle of deviation  $\geq 30$  and  $\leq 55$  PD; were included. A-pattern exotropia was  
112 included when the difference in exodeviation between upgaze and downgaze was more than  $10\Delta$ ,  
113 and V-pattern when this difference was more than  $15\Delta$ . Age ranged from 4 to 50 years old.

114 Patients with oblique muscle overaction ( $\geq +2$ ), sensory exodeviation, anisometropia  $\geq 5$  diopters,  
115 axial length  $< 22.5$  or  $> 25$  mm, associated dissociated vertical deviation DVD, or less than 6  
116 months' follow-up were excluded.

117 Preoperative data collected included best corrected visual acuity in Snellen decimal, cycloplegic  
118 refraction (using 1% cyclopentolate chloride) with retinoscopy or autorefractometry, extraocular  
119 muscle movement, degree of ocular deviation in primary position at distance (6 meters) and at near  
120 (1/3 meter) by prism and alternating cover test, horizontal deviation at 1/3 meter (in upgaze and

121 downgaze, about 25 degrees up and down respectively without glasses to avoid prismatic effect of  
122 spectacle correction), pattern deviation is the difference in horizontal deviation between up and  
123 downgazes, oblique muscle overaction grading from +1 to +4 [17], stereoacuity at near by Titmus  
124 test (with poor being >200 arcsec and moderate being between 80 and 100), slit lamp examination  
125 of the anterior segment and fundus examination by indirect ophthalmoscope.

126 After matching all preoperative data based on age (in years), sex, BCVA, refraction, preoperative  
127 angle of exotropia, V pattern and A pattern, we divided patients in two groups, each group was  
128 further divided into 2 subgroups A and V referring to A- and V-patterns: 1) Group I (32 patients)  
129 underwent bilateral medial rectus plication and vertical transposition, 2) Group II (control group,  
130 32 patients) underwent bimedial resection and vertical transposition. The amount of A- and V-  
131 pattern collapse (the difference between pre and postoperative pattern deviation) was calculated at  
132 1 month and 6 months postoperatively. Success was considered when pattern deviation was  $\leq 8$  PD  
133 at 6 months postoperatively. Success in horizontal deviation was considered when deviation was  
134 10 PD within orthophoria at 6 months postoperatively.

### 135 **Surgical technique**

136 All surgical procedures were performed under general anesthesia by the same surgeon (MG). A  
137 limbal-conjunctival incision was done. It's about three hours length with 2 horizontal releases at  
138 the end of the incision to make the opening wider. The medial rectus muscle was exposed and  
139 freed from the Tenon's tissue to the planned distance for resection or plication.

140 For the plication (Figure 1), one double-armed 6-0 Vicryl suture was passed through the center and  
141 both muscle edges at the desired distance from the muscle's insertion and locked. Then, each  
142 suture was placed toward the site of transposition. For example, if we targeted to transpose the

143 medial rectus a full tendon width superiorly, the inferior suture was passed under the medial rectus  
144 to the superior edge of muscle insertion. The superior suture was passed partial thickness through  
145 the sclera, just anterior to the muscle insertion, with a vertical offset about 8-10 mm. Then, the  
146 inferior suture was passed through the sclera approximately at the superior edge of the insertion.  
147 Both sutures were tied together which resulted in a triangular fold in the muscle.  
148 For the resection, two single-armed Vicryl sutures were passed through both muscle edges at the  
149 desired distance from the muscle insertion and tied, then the muscle was disinserted from the globe  
150 and resected just anterior to the previously-passed sutures. The muscle was then transposed and  
151 secured to the sclera at the desired position with partial-thickness scleral passes.  
152 In the A-pattern group, medial recti were displaced upward (toward the apex of the pattern) by 5  
153 mm if the difference between up and downgazes was  $10 \leq 20$  PD and 8-10 mm if  $> 20$  PD. In the  
154 V-pattern group, they were displaced downward by 5 mm if the difference between up and  
155 downgazes was  $15 \leq 25$  PD and 8-10 mm if the difference  $> 25$  PD.  
156 The amount of horizontal muscle operation was done according to Kenneth Wright's tables for  
157 strabismus [18]. We decreased amount of resection/plication by 1 mm according to surgeon's  
158 experience.



## 159 **Statistical analysis**

160 The collected data was analyzed using the Statistical Package for the Social Sciences (SPSS)  
161 version 28 (IBM Corp., Armonk, NY, USA). Data was double checked for normality using  
162 normality plots and Shapiro-Wilk test. Data was summarized using mean and standard deviation in  
163 quantitative data and using frequency (count) and relative frequency (percentage) for categorical  
164 data. Comparisons between groups were done using unpaired t-test in normally distributed  
165 quantitative variables while non-parametric Mann-Whitney test was used for non-normally  
166 distributed quantitative variables. Comparison between pre- and postoperative values was done  
167 using paired t-test in normally distributed quantitative variables while non-parametric Friedman  
168 test and Wilcoxon signed rank test were used for non-normally distributed quantitative variable  
169 [19]. For comparing categorical data, Chi square ( $\chi^2$ ) test was performed. Exact test was used  
170 instead when the expected frequency was less than 5 [20]. p-values less than 0.05 were considered  
171 significant.

## 172 **Results**

173 64 patients were reviewed, 32 were treated with bilateral medial rectus plication and vertical  
174 transposition (Group I) and 32 patients treated with bilateral medial rectus resection and vertical  
175 transposition (Group II). Each group was further divided into two subgroups: A and V. The mean  
176 age of all patients at the time of operation was  $15.95 \pm 12.79$  years (range: 4-50). Table 1 shows  
177 the preoperative criteria in both groups (no significant difference between both groups).

178 Table 2 shows the intraoperative data and the postoperative outcomes in both groups. Postoperative  
179 angles at 6 months were  $4.6 \pm 6.0$  and  $2.53 \pm 6.5$  PD exodeviation respectively (no significant

180 difference in both groups regarding postoperative horizontal deviation,  $p= 0.185$ ). No significant  
181 difference between both groups was detected regarding stereopsis as a sensory outcome.

182 Regarding pattern deviation, the mean preoperative pattern deviation (difference in prism diopters  
183 between up and down gazes) was  $21.3 \pm 3.7$  PD in group I, with a postoperative pattern collapse of  
184  $16.7 \pm 5.6$  PD. In group II, the mean preoperative pattern deviation was  $21.6 \pm 4.4$  PD, with a  
185 postoperative pattern collapse of  $16.1 \pm 4.1$  PD. Change between pre and postoperative pattern  
186 deviation was significant in each group. The percentage of success in pattern collapse (pattern  
187 deviation  $\leq 8$  PD) was 90.6% in group I and 84.4% in group II. There was no significant difference  
188 in success between both groups ( $p=.708$ ). There were no intra or postoperative complications  
189 recorded.

190 The results of the subgroups regarding pattern deviation are shown in table 3, which shows  
191 significant collapse in pattern deviation postoperatively in the four subgroups.

192 **Discussion**

193 Pattern deviation can be corrected either by oblique muscle surgery in cases with significant  
194 oblique muscle overaction or with horizontal muscles transposition in cases without oblique  
195 overaction.

196 In this retrospective study, we chose only cases with primary exotropia either intermittent or  
197 constant with no oblique overaction. We compared the effect of bimedial plication and  
198 transposition as an alternative technique with bimedial resection and transposition as the standard.

199 Muscle transposition was prescribed in literature either by doing complete muscle disinsertion as in  
200 the Knapp procedure or without muscle disinsertion as in the Nishida procedure. However, both  
201 don't have a strengthening effect; they aimed only to change the pulling force of the muscle [12].

202 **Gokyigit B et al** [14,23] were the first to present this technique (rectus plication and transposition)  
203 and named it "sliding shape extraocular muscle transposition with plication procedure (SSMTP)".

204 There were 10 cases in their study (out of 17 cases) with exotropia and vertical deviation, 5 of  
205 them were treated by medial rectus plication and transposition as a primary surgical intervention

206 except one case who had done one surgery before. There was no anterior segment ischemia even in  
207 cases who had done 3 recti muscles surgery on the same eye. Of ten cases of exotropia, five

208 achieved pattern deviation of less than or equal 8 PD, and three achieved horizontal deviation  
209 within 10 PD of orthophoria. They prescribed this technique to be safe, effective, and with good

210 results on long-term follow-up (between 24 and 40 months). Our study differed from **Gokyigit B**  
211 **et al** in that our sample size was larger (32 patients) and we chose only cases of primary exotropia.

212 However, the follow up period was shorter (6 months).

213 Additionally, **Shah PR& Pihlblad MS** [14] published a report of 4 successful cases of complex  
214 horizontal and vertical squint, who were treated with unilateral recession/plication with vertical  
215 transposition. The technique was effective, and all four cases achieved the required ocular  
216 alignment for both horizontal and vertical deviations. No ischemia occurred even in cases with  
217 previous squint surgery in the same eye.

218 In our study, both horizontal and vertical successes were achieved in both groups. Success in  
219 horizontal deviation was defined as being within 10 PD of orthophoria at 6 months postoperatively.  
220 The percentage of success in group I was 81.3% (26 out of 32 patients) and in group II was 84.4%  
221 (27 out of 32), no significant difference between both groups,  $p=0.74$ . **ElKamshoushy A** [22] also  
222 reported good results with bimedial resection in cases of primary exotropia, success rate was 77%.  
223 However, the study included only cases with large angle exotropia.

224 According to the surgical design in group I, we used a limbal approach and a double armed 6/0  
225 Vicryl suture which passed from the muscle center to the periphery in both sides and was tied. The  
226 two sutures were then tied after passing through partial scleral thickness.

227 **In Shah and Pihlblad's** study, fornix approach was used and two separate single-armed  
228 polyglactin sutures were passed at the muscle edges and tied. **Gokyigit B et al** used limbal  
229 approach and either single- or double-armed sutures. In six patients, they added a central 6/0  
230 Dacron suture to make the whole muscle edge at the same plication line to maintain the effect of  
231 plication.

232 We believe that our technique avoids muscle splitting and decreases the need for a central muscle  
233 suture to enforce the effect of plication. One disadvantage we noticed was that sheath wiring of the

234 sclera may occur after tying the sutures if the scleral paths are too superficial. This can be avoided  
235 by proper passage through the sclera and avoiding superficial paths.

236 Our results in plication and resection were comparable with no significant difference between both  
237 groups. This is like many studies which recorded similar results between plication and resection  
238 [23–25].

239 Anterior segment ischemia is a rare complication of strabismus surgery which occurs secondary to  
240 muscle disinsertion either by recession or resection. The risk increases if three muscles are  
241 operated on in the same eye. Plication offers a good alternative to muscle resection with  
242 preservation of anterior ciliary circulation especially in surgeries where 3-muscle surgery is needed  
243 [24].

244 The unsuccessful cases in pattern collapse were 3 (9.4%) in group I and 5 (15.6%) in group II  
245 ( $p=.708$ ). The causes of residual pattern may be related to unrecognized oblique overaction,  
246 inaccurate measurements of pattern preoperatively, or improper execution of the surgical  
247 technique.

248 The age, demographic and preoperative data were comparable with no significant differences in  
249 both groups. Other strength points in our study were: the presence of a control group and the  
250 average follow-up period of 6 months.

251 However, a larger sample is needed, and a longer follow-up period is recommended to address the  
252 long-term effects of the new technique.

253 In conclusion, we find that horizontal transposition of plicated medial rectus muscle is a safe,  
254 rapid, effective, and simple technique for the correction of primary exotropic patients with A- or  
255 V-pattern not secondary to oblique muscle overaction.

256

257      **Acknowledgements**

258      **Funding.** No funding or sponsorship was received for this study or the publication of this  
259 article.

260      **Authorship.** All authors meet the International Committee of Medical Journal Editors  
261 (ICMJE) criteria for authorship for this manuscript, take responsibility for the integrity of the work  
262 as a whole, and have given final approval for this version to be published.

263      **Compliance with ethics guidelines.** All procedures followed were in accordance with the  
264 ethical standards of the responsible committee on human experimentation (institutional and  
265 national) and with the Helsinki Declaration of 1964, as revised in 2013 .Informed consent was  
266 obtained from all patients included in the study.

267      **Author contributions.** All authors contributed to the study conception and design. Material  
268 preparation, data collection and analysis were performed by Lamiaa El-aidy and Manar Ghaly. The  
269 first draft of the manuscript was written by Lamiaa El-aidy and all authors commented on previous  
270 versions of the manuscript. All authors read and approved the final manuscript.

271      **Disclosures.** All named authors declare that they have no competing interests.

272      **Data availability.** The datasets generated during and/ or analyzed during the current study are  
273 available from the corresponding author on reasonable request.

274

## References

- 275 [1] K. W. Wright, "Alphabet Patterns and Oblique Muscle Dysfunctions," in *Handbook of*  
276 *Pediatric Strabismus and Amblyopia*, K. W. Wright, P. H. Spiegel, and L. S.  
277 Thompson, Eds., New York, NY: Springer New York, 2006, pp. 284–322. doi:  
278 10.1007/0-387-27925-3\_9.
- 279 [2] H. T. Sekeroglu, K. E. Turan, S. Uzun, E. C. Sener, and A. S. Sanac, "Horizontal  
280 muscle transposition or oblique muscle weakening for the correction of V pattern?,"  
281 *Eye*, vol. 28, no. 5, pp. 553–556, May 2014, doi: 10.1038/eye.2014.16.
- 282 [3] S. M. Straight and R. S. Bahl, "A- and V-Pattern Strabismus," in *Practical*  
283 *Management of Pediatric Ocular Disorders and Strabismus: A Case-based Approach*,  
284 E. Traboulsi and V. Utz, Eds., New York, NY: Springer New York, 2016, pp. 583–  
285 592. doi: 10.1007/978-1-4939-2745-6\_54.
- 286 [4] B. J. Kushner, "Effect of ocular torsion on A and V patterns and apparent oblique  
287 muscle overaction.," *Arch Ophthalmol*, vol. 128, no. 6, pp. 712–718, Jun. 2010, doi:  
288 10.1001/archophthalmol.2010.88.
- 289 [5] Y. B. Lee *et al.*, "Effect of horizontal rectus surgery for the correction of intermittent  
290 exotropia on sub-A or sub-V pattern.," *PLoS One*, vol. 12, no. 6, p. e0179626, 2017,  
291 doi: 10.1371/journal.pone.0179626.
- 292 [6] K. H. Shin, H. J. Lee, and H. T. Lim, "Ocular torsion among patients with intermittent  
293 exotropia: relationships with disease severity factors.," *Am J Ophthalmol*, vol. 155,  
294 no. 1, pp. 177–182, Jan. 2013, doi: 10.1016/j.ajo.2012.07.011.
- 295 [7] K. Kumar, H. N. Prasad, S. Monga, and R. Bhola, "Hang-back recession of inferior  
296 oblique muscle in V-pattern strabismus with inferior oblique overaction," *Journal of*  
297 *American Association for Pediatric Ophthalmology and Strabismus*, vol. 12, no. 4, pp.  
298 401–404, Aug. 2008, doi: 10.1016/j.jaapos.2008.01.015.
- 299 [8] S. Akar, B. Gökyiğit, and O. F. Yilmaz, "Graded anterior transposition of the inferior  
300 oblique muscle for V-pattern strabismus.," *J AAPOS*, vol. 16, no. 3, pp. 286–290, Jun.  
301 2012, doi: 10.1016/j.jaapos.2012.01.009.
- 302 [9] Y. Oya, T. Yagasaki, M. Maeda, M. Tsukui, and K. Ichikawa, "Effects of vertical  
303 offsets of the horizontal rectus muscles in V-pattern exotropia without oblique  
304 dysfunction.," *J AAPOS*, vol. 13, no. 6, pp. 575–577, Dec. 2009, doi:  
305 10.1016/j.jaapos.2009.09.017.
- 306 [10] A. M. Mostafa and R. R. Kassem, "A comparative study of medial rectus slanting  
307 recession versus recession with downward transposition for correction of V-pattern  
308 esotropia.," *J AAPOS*, vol. 14, no. 2, pp. 127–131, Apr. 2010, doi:  
309 10.1016/j.jaapos.2009.11.025.
- 310 [11] A. Dickmann *et al.*, "Effect of vertical transposition of the medial rectus muscle on  
311 primary position alignment in infantile esotropia with A- or V-pattern strabismus.," *J*  
312 *AAPOS*, vol. 15, no. 1, pp. 14–16, Feb. 2011, doi: 10.1016/j.jaapos.2010.11.017.
- 313 [12] B. Gokyigit, A. Inal, B. Ocak, and E. D. Aygit, "Sliding Shape Extraocular Muscle  
314 Transposition with Plication: A Novel Method," *Beyoglu Eye Journal*, vol. 4, no. 2,  
315 pp. 120–122, 2019.



- 316 [13] Z. I. Currie, T. Shipman, and J. P. Burke, "Surgical correction of large-angle exotropia  
317 in adults.," *Eye (Lond)*, vol. 17, no. 3, pp. 334–339, Apr. 2003, doi:  
318 10.1038/sj.eye.6700347.
- 319 [14] P. R. Shah and M. S. Pihlblad, "Transposition of plicated horizontal muscles," *Journal*  
320 *of American Association for Pediatric Ophthalmology and Strabismus*, vol. 24, no. 4,  
321 pp. 244–247, Aug. 2020, doi: 10.1016/j.jaapos.2020.04.008.
- 322 [15] K. W. Wright, "Rectus Muscle Plication Procedure," *JAMA Ophthalmology*, vol. 133,  
323 no. 2, pp. 226–227, Feb. 2015, doi: 10.1001/jamaophthalmol.2014.4259.
- 324 [16] B. Gokyigit *et al.*, "Long-term results of 'sliding shape muscle transposition with  
325 plication' operation," *Journal of American Association for Pediatric Ophthalmology*  
326 *and Strabismus*, vol. 23, no. 4, p. e30, Aug. 2019, doi: 10.1016/j.jaapos.2019.08.106.
- 327 [17] K. W. Wright and Y. N. J. Strube, "Inferior Oblique Muscle Weakening Procedures,"  
328 in *Color Atlas Of Strabismus Surgery: Strategies and Techniques*, Fourth edition., K.  
329 W. Wright and Y. N. J. Strube, Eds., New York, NY: Springer New York, 2015, pp.  
330 135–136. doi: 10.1007/978-1-4939-1480-7\_5.
- 331 [18] K. W. Wright and Y. N. J. Strube, "Appendix A: Surgical numbers," in *Color Atlas Of*  
332 *Strabismus Surgery: Strategies and Techniques*, Fourth edition., K. W. Wright and Y.  
333 N. J. Strube, Eds., New York, NY: Springer New York, 2015, pp. 191–192. doi:  
334 10.1007/978-1-4939-1480-7\_5.
- 335 [19] Y. H. Chan, "Biostatistics 102: quantitative data--parametric & non-parametric tests.,"  
336 *Singapore Med J*, vol. 44, no. 8, pp. 391–396, Aug. 2003.
- 337 [20] Y. H. Chan, "Biostatistics 103: qualitative data - tests of independence.," *Singapore*  
338 *Med J*, vol. 44, no. 10, pp. 498–503, Oct. 2003.
- 339 [21] B. Gokyigit, A. İnal, O. B. Ocak, and E. D. Aygit, "Sliding shape extraocular muscle  
340 transposition with plication: Long-term results.," *Int Ophthalmol*, vol. 41, no. 11, pp.  
341 3593–3598, Nov. 2021, doi: 10.1007/s10792-021-01932-9.
- 342 [22] A. A. ElKamshoushy, "Bilateral medial rectus resection for primary large-angle  
343 exotropia.," *J AAPOS*, vol. 21, no. 2, pp. 112–116, Apr. 2017, doi:  
344 10.1016/j.jaapos.2017.03.003.
- 345 [23] Y. Kimura and T. Kimura, "Comparative study of plication–recession versus  
346 resection–recession in unilateral surgery for intermittent exotropia," *Japanese Journal*  
347 *of Ophthalmology*, vol. 61, no. 3, pp. 286–291, May 2017, doi: 10.1007/s10384-017-  
348 0501-5.
- 349 [24] P. A. Huston and D. L. Hoover, "Surgical outcomes following rectus muscle plication  
350 versus resection combined with antagonist muscle recession for basic horizontal  
351 strabismus.," *J AAPOS*, vol. 22, no. 1, pp. 7–11, Feb. 2018, doi:  
352 10.1016/j.jaapos.2017.09.004.
- 353 [25] M. Stunkel, A. J. Cantor, and D. A. Plager, "Intermediate-term outcomes of horizontal  
354 muscle plication versus resection," *Journal of American Association for Pediatric*  
355 *Ophthalmology and Strabismus*, 2021, [Online]. Available:  
356 <https://api.semanticscholar.org/CorpusID:240618297>  
357

358 *Figure 1.*

359 Medial rectus muscle plication and vertical transposition. **a** The medial rectus is stretched  
360 between the two muscle hooks. **b** A single double-armed Vicryl suture was passed through the  
361 muscle center to the superior edge. **c** The suture was passed to the inferior edge after locking the  
362 superior one. **d** Picture after locking both sutures. **e** Inferior suture was passed through the  
363 sclera at the superior pole of muscle insertion and the superior suture was passed through  
364 the sclera a full-tendon-width above the first scleral path. **f** Position of the muscle after  
365 tying the sutures. **g** Final appearance of the folded and transposed muscle.

366 *Table 1: Preoperative data for the studied groups*

| <b>Variables</b>                                         | <b>Group I (n=32)</b> | <b>Group II (n=32)</b> | <b>p value</b> |
|----------------------------------------------------------|-----------------------|------------------------|----------------|
| <b>Age in years: mean ± SD (range)</b>                   | 16.1 ± 12.7 (4-50)    | 15.8 ± 13.1 (4-50)     | 0.82           |
| <b>Male sex: No. (percent)</b>                           | 15 (46.9)             | 17 (53.1)              | 0.62           |
| <b>A pattern: No. (percent)</b>                          | 12 (37.5)             | 11 (34.4)              | 0.79           |
| <b>V pattern: No. (percent)</b>                          | 20 (62.5)             | 21 (65.6)              | 0.79           |
| <b>Preoperative angle of XT in PD: mean ± SD (range)</b> | 40.6 ± 7.2 (30-55)    | 41.1 ± 7.5 (30-55)     | 0.8            |
| <b>Preoperative pattern in PD: mean ± SD (range)</b>     | 21.3 ± 3.7 (15-30)    | 21.6 ± 4.4 (15-35)     | 0.73           |
| <b>Refraction: mean ± SD (range)</b>                     | 0.24 ± 3.09 (-5.5-6)  | 0.06 ± 3.1 (-5.5-4.75) | 0.82           |
| <b>BCVA: mean ± SD (range)</b>                           | 0.78 ± 0.16 (0.4-1)   | 0.80 ± 0.17 (0.4-1)    | 0.58           |
| <b>Preoperative grading</b>                              | Poor (32, 100)        | Poor (32, 100)         | 0.42           |

---

**of stereopsis, No.,**

**percent**

---

367 No. number, SD standard deviation, XT exotropia, PD prism diopters, BCVA best corrected

368 visual acuity

369

370 *Table 2: Intraoperative and postoperative data in both groups*

| <b>Variables</b>                                                           | <b>Group I<br/>(n= 32)</b>                           | <b>Group II<br/>(n= 32)</b>                            | <b>p value</b> |
|----------------------------------------------------------------------------|------------------------------------------------------|--------------------------------------------------------|----------------|
| <b>Amount of MR<br/>plication/resection,<br/>mm, mean ± SD<br/>(range)</b> | 4.6 ± 0.8 (3-6)                                      | 4.6 ± 0.9 (3-6.5)                                      | 0.87           |
| <b>Amount of MR<br/>transposition, mm,<br/>mean ± SD (range)</b>           | 6.1 ± 2.1 (5-10)                                     | 6.1 ± 2.1 (5-10)                                       | 1              |
| <b>Postoperative XT at 1<br/>m, PD, mean ± SD<br/>(range)</b>              | -1.4 ± 6.6 (-25 to 10) *                             | -1.8 ± 6.5 (-25 to 10)                                 | 0.33           |
| <b>Postoperative XT at 6<br/>m, PD, mean ± SD<br/>(range)</b>              | 4.6 ± 6.0 (-12 to 20)                                | 2.5 ± 6.5 (-15 to 20)                                  | 0.19           |
| <b>Pattern collapse</b>                                                    | 16.7 ± 5.6                                           | 16.1 ± 4.1                                             | 0.65           |
| <b>Postoperative grading<br/>of stereopsis, No.,<br/>percent</b>           | Poor (7, 21.9)<br>Moderate (24, 75)<br>Good (1, 3.1) | Poor (6, 18.8)<br>Moderate (25, 78.1)<br>Good (1, 3.1) | 0.56           |

371 MR medial rectus, XT exotropia, \* minus sign refers to esotropia and vice versa, No. number.

372 **Table 3: Preoperative pattern and postoperative surgical correction in subgroups (Mean  $\pm$ SD)**

|                                                                   | <b>Group I</b>   |                  | <b>Group II</b>  |                  |
|-------------------------------------------------------------------|------------------|------------------|------------------|------------------|
|                                                                   | <b>A pattern</b> | <b>V pattern</b> | <b>A pattern</b> | <b>V pattern</b> |
|                                                                   | <b>(n=12)</b>    | <b>(n=20)</b>    | <b>(n=11)</b>    | <b>(n=21)</b>    |
| <b>Preoperative pattern</b>                                       | 21.3 $\pm$ 3.8   | 21.3 $\pm$ 3.7   | 20.5 $\pm$ 4.2   | 22.2 $\pm$ 4.4   |
| <b>Postoperative pattern</b>                                      | 5.4 $\pm$ 5.3    | 4.1 $\pm$ 3.2    | 5.4 $\pm$ 5.6    | 5.5 $\pm$ 3.9    |
| <b>p value*</b><br><b>(between pre- and postoperative values)</b> | 0.002*           | <0.001*          | 0.003*           | <0.001*          |
| <b>Surgical success in pattern, No., percent</b>                  | 10 (83.3)        | 19 (95.0)        | 9 (81.8)         | 18 (85.7)        |

373 No. number; \* significant (Non-parametric Wilcoxon signed rank test)

374

375

376

377

378

379

380

381
